# Supplementary material for: A modular tissue-clearing framework integrated with light-field microscopy enables rapid volumetric phenotyping of cardiac tissue
Source: Research Square preprint supplement (doi:10.21203/rs.3.rs-8566379/v1), 2026-01-16
Supplement: Supplementary file 1 [file b91c890abf2137235a976a29.xlsx]

## Sheet: Sheet 1 - Modular_clearing_work
Modular_clearing_workflow_summary
Biological question	Reporter line(s)	Endogenous signal strength	Amplification / staining	Clearing chemistry	Fixation strategy	Key concern addressed	Primary design driver
Postnatal cardiomyocyte division	αMHC-CreERT2; MADM	Moderate	None	Decolorization (50% tB w/ H₂O₂ & Quadrol) before Clearing	None	Endogenous fluorophore stability	Throughput
Post-MI cardiac remodeling	Myh6-Cre/+; R26-tdTomato/+	Very high	WGA / Phalloidin	Decolorization (50% tB w/ H₂O₂ & Quadrol) before Clearing	A4B0.05P1 post-fixation	Membrane protein integrity	Rapid Phenotyping
Neovascular remodeling	Tg(fli1:EGFP; myl7:DsRed-NLS)	High	None	Direct clearing	A4B0.05P1 post-fixation	Structural integrity/Endogenous fluorophore stability	Throughput
Immune cell infiltration during repair	Tg(mpeg1:EGFP)	Low–moderate	Anti-GFP + cTnT	Direct clearing	A4B0.05P1 post-fixation	Signal amplification vs damage	Data efficiency
Myocardial architecture of amphibian	No; WT Xenopus	N/A	Anti-cTnT	Direct clearing	None	Structural integrity	Rapid Phenotyping
